# Supplementary material for: In vitro cytoprotective and in vivo anti-oral mucositis effects of melatonin and its derivatives
Source: PeerJ. 2024 Jul 5;12:e17608. doi: 10.7717/peerj.17608 (PMC11229687; doi:10.7717/peerj.17608)
Supplement: Supplemental Information 2 [file peerj-12-17608-s002.xlsx]

## Sheet: _xltb_storage_
XL Toolbox Settings
	export_preset	<?xml version="1.0" encoding="utf-16"?>_x000D_ <Preset xmlns:xsd="http://www.w3.org/2001/XMLSchema" xmlns:xsi="http://www.w3.org/2001/XMLSchema-instance">_x000D_ <Name>Tiff, 300 dpi, RGB, Transparent canvas</Name>_x000D_ <Dpi>300</Dpi>_x000D_ <FileType>Tiff</FileType>_x000D_ <ColorSpace>Rgb</ColorSpace>_x000D_ <Transparency>TransparentCanvas</Transparency>_x000D_ <UseColorProfile>false</UseColorP…
	export_path	C:\Users\Pim\My Works\Ph.D\Experiments\+รวมไฟล์เล่มธีสีส+\4 Part Chemoprotective 5-FU\3 Effect of drug on Cell viability against 5-FU\กราฟ.tif

## Sheet: Magellan Sheet 3
			uM	0.001	0.01	0.1	1	12.5	25	50	100	250	500				0.001	0.01	0.1	1	12.5	25	50	100				0.001	0.01	0.1	1	12.5	25	50	100
		Blank	0.5% DMSO +2.5 µg/ml 5-FU	1 nM	10 nM	0.1 mcM	1	12.5	25	50	100	250	500		Blank	0.5% DMSO +2.5 µg/ml 5-FU	1 nM	10 nM	0.1 mcM	1	12.5	25	50	100		Blank	0.5% DMSO +2.5 µg/ml 5-FU	1 nM	10 nM	0.1 mcM	1	12.5	25	50	100
			Control	Melatonin + 2.5 µg/ml 5-FU												Control	4EBM + 2.5 µg/ml 5-FU										Control	4BrBnMLT + 2.5 µg/ml 5-FU
	n1	3.625	1.706	2.106	2.126	2.368	2.251	2.075	2.045	1.444	2.235	1.701	1.743	n1	3.58	1.973	2.218	2.154	1.935	1.959	2.311	2.481	2.185	1.554	n1	2.845	1.609	1.863	1.644	1.718	1.721	2.139	2.147	2.046	1.97
	n2	3.51	1.684	1.829	1.906	1.605	2.204	1.935	2.031	1.793	1.717	1.73	1.567	n2	3.519	1.907	1.941	1.973	2.237	1.977	2.289	2.223	2.035	1.649	n2	2.749	0.993	1.51	1.475	1.426	1.763	2.128	1.878	1.832	1.556
	n3	3.557	1.61	1.667	2.015	2.024	1.919	1.931	1.987	1.77	1.727	1.757	1.894	n3	3.565	2.073	2.236	1.721	2.032	1.891	2.342	2.475	2.111	1.799	n3	3.209	1.366	2.458	1.452	1.673	1.782	2.29	2.168	2.145	2.131
	n4	3.52	1.624	2.119	1.87	2.137	2.324	2.107	1.96	2.113	1.924	1.675	1.699	n4	3.518	1.856	1.927	2.204	1.827	1.89	2.146	2.237	2.059	1.666	n4	3.078	1.711	2.406	2.081	2.278	1.977	2.092	2.291	2.084	2.093
	n5	3.435	1.471	2.161	2.268	1.936	2.212	2.062	1.937	1.904	1.526	1.506	1.49	n5	2.187	2.087	2.189	1.953	1.604	2.135	2.214	2.032	2.148	1.722	n5	3.359	2.081	2.412	2.331	2.264	1.97	2.078	2.32	2.029	2.092
	n6	3.639	1.598	2.072	2.32	2.024	1.855	1.627	1.771	1.903	1.597	1.795	1.892	n6	3.459	1.882	2.234	1.617	1.771	1.98	2.289	2.098	2.277	1.713	n6	2.68	1.63	2.126	1.903	1.976	2.03	2.236	2.283	2.228	2.212
	n7	3.666	1.315	2.16	1.871	2.197	2.013	2.295	1.799	2.265	1.738	1.694	1.885	n7	3.472	2.029	2.043	1.977	1.607	1.973	2.302	2.258	2.132	1.613	n7	3.347	1.592	2.541	1.914	1.874	2.121	2.163	2.312	2.252	1.957
	n8	3.447	1.447	1.818	2.161	1.908	2.104	2.018	1.71	2.203	1.807	1.617	1.724	n8	3.621	1.954	1.933	1.621	1.4	1.888	2.324	2.087	2.064	1.516	n8	3.274	1.568	1.787	1.888	1.989	1.998	1.943	1.947	1.721	1.806
	Average	3.54987	1.55688	1.9915	2.06713	2.02488	2.11025	2.00625	1.905	1.92437	1.78387	1.68438	1.73675	Average	3.36512	1.97012	2.09013	1.9025	1.80163	1.96163	2.27712	2.23637	2.12638	1.654	Average	3.06763	1.56875	2.13788	1.836	1.89975	1.92025	2.13362	2.16825	2.04212	1.97713
	SD	0.0873293	0.133828	0.19078	0.178316	0.226081	0.167275	0.191263	0.127316	0.267785	0.218736	0.0897679	0.152191	SD	0.479114	0.0868109	0.14336	0.227068	0.267323	0.0813352	0.0650636	0.169309	0.0789574	0.0926005	SD	0.274375	0.307326	0.37892	0.300706	0.292546	0.145223	0.104896	0.171371	0.184544	0.211306
	SE
	%Viability	228.013	100	127.916	132.774	130.06	135.544	128.864	122.36	123.605	114.58	108.189	111.554		170.808	100	106.091	96.5675	91.4472	99.5686	115.583	113.514	107.931	83.9541		195.546	100	136.279	117.036	121.1	122.406	136.008	138.215	130.175	126.032
	SD	5.60927	8.59591	12.254	11.4535	14.5215	10.7443	12.285	8.17768	17.2001	14.0497	5.7659	9.77544		24.319	4.40636	7.2767	11.5256	13.5688	4.12843	3.30251	8.59384	4.00773	4.70024		17.49	19.5905	24.1543	19.1685	18.6483	9.25723	6.68658	10.924	11.7637	13.4697
	SE	1.98318	3.03911	4.33245	4.04941	5.13412	3.79869	4.34341	2.89125	6.08116	4.9673	2.03855	3.45614		8.59806	1.55788	2.5727	4.07491	4.79731	1.45962	1.16761	3.03838	1.41695	1.66178		6.18367	6.92628	8.53982	6.77709	6.59318	3.27292	2.36406	3.86223	4.15911	4.76227
	%Protective	128.013	0	27.9165	32.774	30.0602	35.544	28.8639	22.3605	23.605	14.5805	8.18948	11.5536		70.8077	0	6.09098	-3.43252	-8.55276	-0.431445	15.5828	13.5144	7.93097	-16.0459		95.5458	0	36.2789	17.0359	21.0996	22.4064	36.008	38.2151	30.1753	26.0319
Cell viability	n1	102.116	48.058	59.326	59.8894	66.7066	63.4107	58.4528	57.6077	40.6775	62.96	47.9172	49.1003		n1	58.6308	65.9114	64.0095	57.5016	58.2148	68.675	73.7268	64.9307	46.1796		n1	52.451	60.731	53.5919	56.0042	56.102	69.7282	69.989	66.6965	64.2191
	n2	98.8767	47.4383	51.5229	53.692	45.2129	62.0867	54.509	57.2133	50.5088	48.3679	48.7341	44.1424		n2	56.6695	54.678	55.5794	63.0163	55.6921	64.4811	62.6219	57.326	46.4523		n2	32.3703	49.2237	48.0828	46.4855	57.4712	69.3696	61.22	59.7205	50.7233
	n3	100.201	45.3537	46.9594	56.7626	57.0161	54.0582	54.3963	55.9738	49.8609	48.6496	49.4947	53.354		n3	61.6025	62.9881	48.4806	57.2415	53.2695	65.9742	69.7208	59.4669	50.6778		n3	44.5296	80.1271	47.333	54.5373	58.0905	74.6506	70.6736	69.9238	69.4674
	n4	99.1584	45.7481	59.6922	52.6779	60.1993	65.4671	59.3542	55.2132	59.5232	54.1991	47.1848	47.8608		n4	55.154	54.2836	62.0867	51.4666	53.2413	60.4528	63.0163	58.002	46.9312		n4	55.776	78.432	67.8375	74.2594	64.4473	68.1961	74.6832	67.9353	68.2287
	n5	96.764	41.4381	60.8754	63.8896	54.5371	62.3121	58.0866	54.5653	53.6357	42.9874	42.424	41.9733		n5	62.0185	61.6641	55.016	45.1847	60.143	62.3684	57.2415	60.5092	48.5088		n5	67.8375	78.6276	75.9871	73.803	64.2191	67.7397	75.6285	66.1424	68.1961
	n6	102.511	45.0157	58.3683	65.3544	57.0161	52.2554	45.8326	49.8891	53.6075	44.9875	50.5652	53.2977		n6	55.9266	62.9318	45.5509	49.8891	55.7766	64.4811	59.1007	64.1431	48.2552		n6	53.1356	69.3044	62.035	64.4147	66.175	72.8903	74.4224	72.6295	72.1079
	n7	103.271	37.0436	60.8472	52.7061	61.8895	56.7062	64.6502	50.6778	63.8051	48.9595	47.72	53.1005		n7	60.2949	57.5513	55.6921	45.2692	55.5794	64.8474	63.6079	60.0585	45.4382		n7	51.8968	82.8328	62.3935	61.0896	69.1414	70.5106	75.3678	73.4118	63.7953
	n8	97.102	40.762	51.2131	60.8754	53.7484	59.2697	56.8471	48.1707	62.0585	50.9032	45.5509	48.5651		n8	58.0662	54.4526	45.6636	39.438	53.185	65.4671	58.7908	58.1429	42.7057		n8	51.1145	58.2535	61.546	64.8384	65.1318	63.3389	63.4693	56.102	58.8729
	%Viability	100	43.8572	56.1006	58.2309	57.0407	59.4458	56.5161	53.6639	54.2097	50.2518	47.4489	48.9243		%Viability	58.5454	59.3076	54.0099	51.1259	55.6377	64.5934	63.4783	60.3224	46.8936		%Viability	51.1389	69.6915	59.8509	61.929	62.5973	69.553	70.6817	66.5702	64.4513
Cell death	n1		51.942	40.674	40.1106	33.2934	36.5893	41.5472	42.3923	59.3225	37.04	52.0828	50.8997		n1	41.3692	34.0886	35.9905	42.4984	41.7852	31.325	26.2732	35.0693	53.8204		n1	47.549	39.269	46.4081	43.9958	43.898	30.2718	30.011	33.3035	35.7809
	n2		52.5617	48.4771	46.308	54.7871	37.9133	45.491	42.7867	49.4912	51.6321	51.2659	55.8576		n2	43.3305	45.322	44.4206	36.9837	44.3079	35.5189	37.3781	42.674	53.5477		n2	67.6297	50.7763	51.9172	53.5145	42.5288	30.6304	38.78	40.2795	49.2767
	n3		54.6463	53.0406	43.2374	42.9839	45.9418	45.6037	44.0262	50.1391	51.3504	50.5053	46.646		n3	38.3975	37.0119	51.5194	42.7585	46.7305	34.0258	30.2792	40.5331	49.3222		n3	55.4704	19.8729	52.667	45.4627	41.9095	25.3494	29.3264	30.0762	30.5326
	n4		54.2519	40.3078	47.3221	39.8007	34.5329	40.6458	44.7868	40.4768	45.8009	52.8152	52.1392		n4	44.846	45.7164	37.9133	48.5334	46.7587	39.5472	36.9837	41.998	53.0688		n4	44.224	21.568	32.1625	25.7406	35.5527	31.8039	25.3168	32.0647	31.7713
	n5		58.5619	39.1246	36.1104	45.4629	37.6879	41.9134	45.4347	46.3643	57.0126	57.576	58.0267		n5	37.9815	38.3359	44.984	54.8153	39.857	37.6316	42.7585	39.4908	51.4912		n5	32.1625	21.3724	24.0129	26.197	35.7809	32.2603	24.3715	33.8576	31.8039
	n6		54.9843	41.6317	34.6456	42.9839	47.7446	54.1674	50.1109	46.3925	55.0125	49.4348	46.7023		n6	44.0734	37.0682	54.4491	50.1109	44.2234	35.5189	40.8993	35.8569	51.7448		n6	46.8644	30.6956	37.965	35.5853	33.825	27.1097	25.5776	27.3705	27.8921
	n7		62.9564	39.1528	47.2939	38.1105	43.2938	35.3498	49.3222	36.1949	51.0405	52.28	46.8995		n7	39.7051	42.4487	44.3079	54.7308	44.4206	35.1526	36.3921	39.9415	54.5618		n7	48.1032	17.1672	37.6065	38.9104	30.8586	29.4894	24.6322	26.5882	36.2047
	n8		59.238	48.7869	39.1246	46.2516	40.7303	43.1529	51.8293	37.9415	49.0968	54.4491	51.4349		n8	41.9338	45.5474	54.3364	60.562	46.815	34.5329	41.2092	41.8571	57.2943		n8	48.8855	41.7465	38.454	35.1616	34.8682	36.6611	36.5307	43.898	41.1271
	%Cell death		56.1428	43.8994	41.7691	42.9593	40.5542	43.4839	46.3361	45.7903	49.7482	52.5511	51.0757		%Cell death	41.4546	40.6924	45.9901	48.8741	44.3623	35.4066	36.5217	39.6776	53.1064		%Cell death	48.8611	30.3085	40.1491	38.071	37.4027	30.447	29.3183	33.4298	35.5487
	n1		7.48244	27.5527	28.5562	40.6987	34.8281	25.9972	24.492	-5.66357	34.0253	7.23156	9.33894		n1		39.2823	35.8948	24.303	25.5733	44.2048	53.203	37.5356	4.13657		n1		19.6314	5.02043	9.95747	10.1576	38.0452	38.5789	31.8405	26.7701
	n2		6.37858	13.654	17.5176	2.4147	32.4699	18.9727	23.7895	11.8477	8.03437	8.68665	0.508028		n2		19.2737	20.8793	34.1257	21.08	36.7348	33.4232	23.9902	4.62243		n2		-3.91961	-6.25469	-9.52381	12.9597	37.3113	20.6321	17.5632	-0.850638
	n3		2.66558	5.52559	22.9867	23.4383	18.1698	18.772	21.5818	10.6937	8.53613	10.0414	16.9155		n3		34.0755	8.23507	23.8397	16.7649	39.3941	46.0675	27.8036	12.1488		n3		59.3278	-7.78918	6.95522	14.2273	48.1194	39.98	38.4455	37.5115
	n4		3.36804	28.205	15.7112	29.1081	38.491	27.6029	20.227	27.9039	18.4207	5.92699	7.13121		n4		18.5712	32.4699	13.5537	16.7148	29.5597	34.1257	25.1944	5.47541		n4		55.8586	34.1756	47.3188	27.2371	34.9095	48.1861	34.3758	34.9762
	n5		-4.30883	30.3123	35.6811	19.0228	32.8713	25.345	19.073	17.4172	-1.54917	-2.55268	-3.35549		n5		31.7173	19.8758	2.36453	29.0078	32.9717	23.8397	29.6601	8.28525		n5		56.2589	50.8548	46.3848	26.7701	33.9755	50.1209	30.7064	34.9095
	n6		2.06347	25.8467	38.2903	23.4383	14.9586	3.51856	10.7439	17.367	2.0133	11.9481	16.8151		n6		33.9752	3.01681	10.7439	21.2306	36.7348	27.1513	36.1327	7.83367		n6		37.1779	22.3001	27.1704	30.7731	44.5167	47.6524	43.983	42.9155
	n7		-12.1362	30.2622	15.7614	32.1187	22.8864	37.0359	12.1488	35.5306	9.08806	6.88033	16.4639		n7		24.3916	21.08	2.51505	20.8793	37.3871	35.1794	28.8573	2.81611		n7		64.8653	23.0339	20.3653	36.8443	39.6464	49.5872	45.5842	25.9028
	n8		-5.51305	13.1021	30.3123	17.6179	27.4523	23.1372	7.68314	32.4197	12.5502	3.01681	8.3856		n8		18.8723	3.21751	-7.8713	16.6144	38.491	26.5993	25.4453	-2.05093		n8		14.5609	21.2993	28.0377	28.6381	24.9687	25.2356	10.1576	15.8285
	%Protective		0	21.8076	25.6021	23.4822	27.7659	22.5477	17.4674	18.4395	11.3899	6.39739	9.02534		%Protective		27.5199	18.0837	12.9468	20.9831	36.9348	34.9486	29.3274	5.40841		%Protective		37.9701	17.83	22.0832	23.4509	37.6866	39.9967	31.582	27.2454
	SD		6.71488	9.57248	8.94713	11.3438	8.39315	9.59672	6.38817	13.4363	10.9752	4.50416	7.6363				8.22247	12.474	13.916	4.48242	4.33765	10.0983	5.02818	4.21209				25.2803	20.0621	19.5177	9.68878	6.9983	11.4333	12.3122	14.0977
	SE		2.37407	3.38438	3.16329	4.01063	2.96743	3.39295	2.25856	4.75043	3.88032	1.59246	2.69984				2.90708	4.41024	4.92005	1.58477	1.53359	3.57028	1.77773	1.4892				8.93793	7.09302	6.90055	3.4255	2.47427	4.04228	4.353	4.98428
	n1			35.271	36.5556	52.0996	44.5845	33.2798	31.3529	-7.2501	43.5568	9.25733	11.955		n1		50.2864	45.9499	31.111	32.7372	56.5878	68.1066	48.0504	5.29533				38.4745	22.1965	27.6969	27.9198	58.9893	59.5839	52.0767	46.4277
	n2			17.4789	22.4247	3.09113	41.5656	24.2874	30.4536	15.1666	10.285	11.12	0.650341		n2		24.6728	26.7282	43.6853	26.9851	47.0253	42.786	30.7106	5.9173				12.2365	9.63496	5.99285	31.0417	58.1717	39.5895	36.1703	15.6556
	n3			7.07346	29.4259	30.004	23.2597	24.0305	27.6275	13.6893	10.9273	12.8543	21.654		n3		43.621	10.542	30.5179	21.4613	50.4295	58.9723	35.5921	15.552				82.7002	7.9254	24.3521	32.4539	70.2129	61.1448	59.4352	58.3946
	n4			36.106	20.1124	37.2621	49.2734	35.3352	25.8932	35.7206	23.5809	7.58731	9.12886		n4		23.7736	41.5656	17.3505	21.397	37.8402	43.6853	32.2521	7.00923				78.8351	54.6782	69.321	46.948	55.4958	70.2873	54.9012	55.5702
	n5			38.8037	45.6764	24.3517	42.0795	32.4448	24.4159	22.2963	-1.98314	-3.26776	-4.29546		n5		40.6022	25.4436	3.0269	37.1337	42.2079	30.5179	37.9687	10.6062				79.281	73.2604	68.2804	46.4277	54.4552	72.4428	50.8131	55.4958
	n6			33.0871	49.0165	30.004	19.1489	4.50422	13.7535	22.232	2.57728	15.2951	21.5255		n6		43.4926	3.8619	13.7535	27.1778	47.0253	34.7571	46.2545	10.0281				58.023	41.4477	46.8737	50.8874	66.1992	69.6926	65.6045	64.4153
	n7			38.7395	20.1766	41.116	29.2975	47.4107	15.552	45.4837	11.6339	8.80771	21.0759		n7		31.2244	26.9851	3.21959	26.7282	47.8603	45.0341	36.941	3.60498				88.8694	42.2653	39.2921	57.6514	60.7732	71.8482	67.3884	45.4614
	n8			16.7724	38.8037	22.5532	35.1425	29.6186	9.83541	41.5014	16.0658	3.8619	10.7346		n8		24.159	4.11883	-10.0763	21.2686	49.2734	34.0506	32.5733	-2.62545				32.8255	40.3328	47.84	48.5089	44.4208	44.7181	27.9198	34.2378
	%Protective			27.9165	32.774	30.0602	35.544	28.8639	22.3605	23.605	14.5805	8.18948	11.5536		%Protective		35.229	23.1494	16.5735	26.8611	47.2812	44.7387	37.5428	6.92346				58.9057	36.4677	41.2061	42.7299	58.5898	61.1634	51.7887	46.9573
