# Supplementary material for: In vitro cytoprotective and in vivo anti-oral mucositis effects of melatonin and its derivatives
Source: PeerJ. 2024 Jul 5;12:e17608. doi: 10.7717/peerj.17608 (PMC11229687; doi:10.7717/peerj.17608)
Supplement: Supplemental Information 3 [file peerj-12-17608-s003.xlsx]

## Sheet: Weight (of initial)
			5-FU		5-FU		5-FU								Euthanasia							5-FU		5-FU		5-FU								Euthanasia		5-FU		5-FU		5-FU								Euthanasia
									Treat D1	Treat D2	Treat D3	Treat D4	Treat D5	Treat D6														Treat D1	Treat D2	Treat D3	Treat D4	Treat D5	Treat D6									Treat D1	Treat D2	Treat D3	Treat D4	Treat D5	Treat D6
		Day 0	D-6	D-5	D-4	D-3	D-2	D-1	D0	D1	D2	D3	D4	D5	D6						Day0	D-6	D-5	D-4	D-3	D-2	D-1	D0	D1	D2	D3	D4	D5	D6		D-6	D-5	D-4	D-3	D-2	D-1	D0	D1	D2	D3	D4	D5	D6
		38.31	38.61	39.84	40.14	40.33	40.07	38.82	39.63	39.17	40.02	39.57	39.98	40.49	40.79		D5 vs D6	<0.01			108.537	109.387	112.872	113.722	114.26	113.523	109.982	112.277	110.974	113.382	112.107	113.268	114.713	115.563		108.465	111.921	112.763	113.297	112.567	109.055	111.331	110.038	112.426	111.162	112.314	113.747	114.589
1		34.83	35.13	35.74	36.3	35.75	36.58	34.99	35.17	34.57	34.95	34.93	34.95	35.54	36.12		D5 vs D7	<0.01			98.6779	99.5278	101.256	102.843	101.284	103.636	99.1312	99.6411	97.9413	99.0178	98.9612	99.0178	100.689	102.333		98.689	100.403	101.976	100.431	102.762	98.2957	98.8014	97.1158	98.1834	98.1272	98.1834	99.8408	101.47
5-FU + Blank gel		32.55	32.85	33.42	33.59	33.54	33.6	31.72	31.4	31.49	33.09	33.16	33.33	34	34.17		D5 vs D8	<0.01			92.2183	93.0683	94.6832	95.1648	95.0231	95.1931	89.8668	88.9602	89.2152	93.7482	93.9465	94.4282	96.3264	96.808		92.2839	93.8852	94.3628	94.2223	94.3909	89.1095	88.2105	88.4633	92.9581	93.1548	93.6324	95.5146	95.9921
Negative		39	39.3	39.82	40.25	39.45	40.45	38.75	39.4	38.29	38.33	37.98	38.31	38.46	38.04		D5 vs D9	<0.05			110.492	111.342	112.815	114.033	111.767	114.6	109.784	111.625	108.48	108.594	107.602	108.537	108.962	107.772		110.404	111.864	113.072	110.825	113.634	108.859	110.685	107.566	107.679	106.695	107.622	108.044	106.864
		33.66	33.96	34.72	35.17	35.17	35.75	33.21	33.41	33.51	34.18	35.17	35.09	35.11	35.2		D5 vs D10	<0.05			95.3631	96.2131	98.3662	99.6411	99.6411	101.284	94.0882	94.6548	94.9381	96.8363	99.6411	99.4145	99.4711	99.7261		95.4022	97.5372	98.8014	98.8014	100.431	93.2953	93.8571	94.138	96.0202	98.8014	98.5766	98.6328	98.8857
		33.43	33.73	34.86	35.14	34.87	34.78	32.85	32.49	30.68	31.45	32.65	33.51	33.75	33.63		D5 vs D11	<0.05			94.7115	95.5614	98.7629	99.5561	98.7912	98.5362	93.0683	92.0484	86.9204	89.1019	92.5017	94.9381	95.6181	95.2781		94.7561	97.9305	98.7171	97.9586	97.7058	92.2839	91.2726	86.1878	88.351	91.7221	94.138	94.8122	94.4751
	Average	35.2967	35.5967	36.4	36.765	36.5183	36.8717	35.0567	35.25	34.6183	35.3367	35.5767	35.8617	36.225	36.325		D5 vs D12	non-sig			100	100.85	103.126	104.16	103.461	104.462	99.32	99.8678	98.0782	100.113	100.793	101.601	102.63	102.913		100	102.257	103.282	102.589	103.582	98.483	99.0261	97.2516	99.2696	99.9438	100.744	101.765	102.046
	SD	2.70998	2.70998	2.75826	2.79347	2.72468	2.80912	3.07313	3.52814	3.48501	3.24144	2.70968	2.69523	2.68232	2.68671		D5 vs D13	non-sig			7.67772	7.67772	7.81451	7.91426	7.71936	7.95861	8.70658	9.99569	9.87348	9.18342	7.67688	7.63593	7.59935	7.61181		7.61301	7.74865	7.84756	7.6543	7.89154	8.6332	9.91144	9.79027	9.10603	7.61218	7.57158	7.53531	7.54766
	SE	1.10634	1.10634	1.12606	1.14043	1.11234	1.14682	1.2546	1.44036	1.42275	1.32331	1.10622	1.10032	1.09505	1.09685						3.13442	3.13442	3.19026	3.23098	3.15141	3.24909	3.55445	4.08072	4.03083	3.74912	3.13407	3.11736	3.10242	3.10751		3.108	3.16337	3.20375	3.12485	3.22171	3.52449	4.04633	3.99686	3.71752	3.10766	3.09108	3.07628	3.08132
		38.1	38.93	39.77	39.99	39.12	39.5	36.72	36.3	36.59	40.55	40.04	39.95	40.53	40.57		D5 vs D6	<0.01			107.173	109.508	111.871	112.489	110.042	111.111	103.291	102.11	102.925	114.065	112.63	112.377	114.008	114.121		107.354	109.67	110.277	107.878	108.925	101.259	100.101	100.901	111.821	110.415	110.166	111.766	111.876
2		33.35	34.18	34.39	35.16	35.08	35.29	34.22	34.37	33.99	34.05	34.04	34.2	34.03	34.6		D5 vs D7	<0.01			93.8115	96.1463	96.737	98.903	98.6779	99.2686	96.2588	96.6807	95.6118	95.7806	95.7525	96.2025	95.7243	97.3277		94.255	94.8341	96.9574	96.7368	97.3159	94.3653	94.7789	93.731	93.8965	93.8689	94.3101	93.8413	95.4132
Positive		33.91	34.74	37.47	37.8	37.13	37.86	34.49	34.47	34.22	36.59	36.29	36.79	37.69	37.38		D5 vs D8	<0.01			95.3868	97.7215	105.401	106.329	104.444	106.498	97.0183	96.962	96.2588	102.925	102.082	103.488	106.02	105.148		95.7992	103.328	104.238	102.39	104.403	95.1098	95.0547	94.3653	100.901	100.074	101.452	103.934	103.079
5-FU + Benzydamine		34.85	34.98	35.39	35.9	35.18	35.4	33.16	35.08	32.97	35.67	35.27	35.01	35.23	34.92		D5 vs D9	non-sig			98.0309	98.3966	99.5499	100.985	98.9592	99.5781	93.2771	98.6779	92.7426	100.338	99.2124	98.481	99.0999	98.2278		96.4611	97.5917	98.9981	97.0126	97.6193	91.4422	96.7368	90.9183	98.3638	97.2608	96.5438	97.1505	96.2956
		36.86	37.69	38.2	38.72	37.05	37.34	34.93	34.45	34.13	37.86	38.35	37.9	38.51	38.79		D5 vs D10	non-sig			103.685	106.02	107.454	108.917	104.219	105.035	98.256	96.9058	96.0056	106.498	107.876	106.61	108.326	109.114		103.934	105.341	106.775	102.169	102.969	96.3232	94.9995	94.1171	104.403	105.754	104.513	106.195	106.968
		36.23	37.06	37.35	37.69	37.16	36.56	33.88	33.02	33.04	36.7	37.65	38.42	38.4	37.98		D5 vs D11	non-sig			101.913	104.248	105.063	106.02	104.529	102.841	95.3024	92.8833	92.9395	103.235	105.907	108.073	108.017	106.835		102.197	102.997	103.934	102.473	100.818	93.4277	91.0562	91.1113	101.204	103.824	105.947	105.892	104.734
	Average	35.55	36.2633	37.095	37.5433	36.7867	36.9917	34.5667	34.615	34.1567	36.9033	36.94	37.045	37.3983	37.3733		D5 vs D12	non-sig			100	102.007	104.346	105.607	103.479	104.055	97.2339	97.3699	96.0806	103.807	103.91	104.205	105.199	105.129		100	102.293	103.53	101.443	102.008	95.3213	95.4545	94.1906	101.765	101.866	102.156	103.13	103.061
	SD	1.8276	1.90205	1.9394	1.77983	1.50101	1.5989	1.21203	1.06843	1.31215	2.1916	2.17824	2.16152	2.37398	2.29364		D5 vs D13	non-sig			5.14093	5.35035	5.45541	5.00655	4.22225	4.49762	3.40938	3.00544	3.69101	6.16484	6.12725	6.08024	6.67786	6.45187		5.2451	5.3481	4.90806	4.13919	4.40915	3.34231	2.94632	3.6184	6.04357	6.00672	5.96063	6.5465	6.32496
	SE	0.746114	0.776508	0.791756	0.726612	0.612784	0.65275	0.494811	0.436186	0.535684	0.894717	0.889262	0.882439	0.969173	0.936375						2.09877	2.18427	2.22716	2.04391	1.72372	1.83615	1.39187	1.22697	1.50685	2.51678	2.50144	2.48225	2.72622	2.63397		2.1413	2.18335	2.00371	1.68982	1.80003	1.36449	1.20283	1.47721	2.46728	2.45223	2.43342	2.6726	2.58215
		34.36	35.16	36.52	36.22	35.89	35.85	34.15	34.45	34.13	35.23	35.12	35.75	36.19	36.15		D5 vs D6	<0.01			95.0046	97.2166	100.977	100.147	99.235	99.1244	94.424	95.2535	94.3687	97.4101	97.106	98.8479	100.065	99.9539		95.1556	98.8363	98.0244	97.1313	97.023	92.4222	93.2341	92.3681	95.3451	95.0474	96.7524	97.9432	97.8349
3		36.08	36.88	37.35	37.74	37.05	37.38	34.81	35.45	35.47	36.15	37.84	37.64	37.97	37.49		D5 vs D7	<0.01			99.7604	101.972	103.272	104.35	102.442	103.355	96.2488	98.0184	98.0737	99.9539	104.627	104.074	104.986	103.659		99.8106	101.083	102.138	100.271	101.164	94.2084	95.9405	95.9946	97.8349	102.409	101.867	102.76	101.461
5-FU + Melatonin		36.43	37.23	37.61	37.45	37.26	37.77	36.35	37.22	36.77	36.61	36.01	36.32	37.06	37		D5 vs D8	<0.01			100.728	102.94	103.991	103.548	103.023	104.433	100.507	102.912	101.668	101.226	99.5668	100.424	102.47	102.304		100.758	101.786	101.353	100.839	102.219	98.3762	100.731	99.5129	99.0798	97.456	98.295	100.298	100.135
		38.19	38.99	40.42	41.08	40.93	40.87	38.24	38.85	39.27	41.01	41.19	41.22	42.43	42.13		D5 vs D9	<0.01			105.594	107.806	111.76	113.585	113.171	113.005	105.733	107.419	108.581	113.392	113.889	113.972	117.318	116.488		105.521	109.391	111.177	110.771	110.609	103.491	105.142	106.279	110.988	111.475	111.556	114.831	114.019
		36.13	36.83	38.42	37.83	37.75	37.96	36.08	36.47	35.75	36.58						D5 vs D10	<0.05			99.8986	101.834	106.23	104.599	104.378	104.959	99.7604	100.839	98.8479	101.143						99.6752	103.978	102.382	102.165	102.733	97.6455	98.7009	96.7524	98.9986
		35.81	36.61	37.93	38.03	37.92	37.85	35.87	35.23	35.33	36.31	36.6	36.15	37.21	37.02		D5 vs D11	non-sig			99.0138	101.226	104.876	105.152	104.848	104.654	99.1797	97.4101	97.6866	100.396	101.198	99.9539	102.885	102.359		99.0798	102.652	102.923	102.625	102.436	97.0771	95.3451	95.6157	98.2679	99.0528	97.8349	100.704	100.189
	Average	36.1667	36.95	38.0417	38.0583	37.8	37.9467	35.9167	36.2783	36.12	36.9817	37.352	37.416	38.172	37.958		D5 vs D12	non-sig			100	102.166	105.184	105.23	104.516	104.922	99.3088	100.309	99.871	102.253	103.277	103.454	105.545	104.953		100	102.954	103	102.3	102.697	97.2034	98.1822	97.7537	100.086	101.088	101.261	103.307	102.728
	SD	1.22991	1.23118	1.32607	1.61458	1.6921	1.63118	1.41141	1.59153	1.76003	2.03657	2.36203	2.24166	2.46281	2.38176		D5 vs D13	non-sig			3.40066	3.40418	3.66655	4.46427	4.67862	4.51017	3.9025	4.40055	4.86645	5.63107	6.53095	6.19813	6.80961	6.58551		3.33201	3.58882	4.36962	4.57943	4.41456	3.81977	4.30726	4.76329	5.51169	6.39249	6.06673	6.66524	6.44589
	SE	0.502107	0.502626	0.541365	0.659148	0.690797	0.665926	0.576204	0.649741	0.718531	0.831426	1.05633	1.0025	1.1014	1.06515						1.38831	1.38975	1.49686	1.82253	1.91004	1.84127	1.59319	1.79652	1.98672	2.29887	2.92073	2.77189	3.04535	2.94513		1.36029	1.46513	1.78389	1.86954	1.80224	1.55942	1.75843	1.9446	2.25014	2.85881	2.71313	2.98079	2.88269
		38.03	38.53	38.2	37.99	37.67	37.89	36.49	36.11	36.14	36.72	36.67	36.45	37.07	36.89		D5 vs D6	<0.01			102.788	104.14	103.248	102.68	101.815	102.41	98.6261	97.599	97.6801	99.2477	99.1126	98.518	100.194	99.7072		103.026	102.144	101.582	100.726	101.315	97.5712	96.5551	96.6353	98.1862	98.0525	97.4642	99.1221	98.6408
4		39.24	39.94	39.14	39.78	38.5	38.97	36.48	36.12	35.98	38.15	38.29	39.24	39.11	39.45		D5 vs D7	<0.01			106.059	107.951	105.789	107.518	104.059	105.329	98.599	97.626	97.2476	103.113	103.491	106.059	105.707	106.626		106.796	104.657	106.368	102.946	104.203	97.5445	96.5818	96.2075	102.01	102.384	104.924	104.577	105.486
5-FU + 4-EBM		36.19	36.69	37.22	37.31	37.85	37.58	34.97	36.25	36.02	36.84	37.02	37.48	37.62	37.56		D5 vs D8	<0.01			97.8152	99.1666	100.599	100.842	102.302	101.572	94.5178	97.9774	97.3557	99.5721	100.059	101.302	101.68	101.518		98.106	99.5232	99.7638	101.208	100.486	93.5068	96.9295	96.3145	98.5071	98.9884	100.218	100.593	100.432
		33.4	33.9	34.15	34.07	32.96	32.87	30.79	29.95	29.51	31.12	32.18	32.93	33.77	33.57		D5 vs D9	<0.01			90.2743	91.6257	92.3015	92.0852	89.0851	88.8418	83.22	80.9496	79.7603	84.1119	86.9769	89.004	91.2744	90.7338		90.6458	91.3142	91.1003	88.1323	87.8916	82.3299	80.0838	78.9073	83.2123	86.0466	88.0521	90.2981	89.7634
		39.87	39.97	40.32	40.71	40.61	41.27	39.05	40.05	39.73	40.24	39.63	40.41	41.35	40.78		D5 vs D10	<0.01			107.762	108.032	108.978	110.032	109.762	111.546	105.545	108.248	107.383	108.762	107.113	109.221	111.762	110.221		106.876	107.812	108.855	108.588	110.353	104.416	107.09	106.235	107.598	105.967	108.053	110.566	109.042
		35.26	35.36	35.65	35.92	35.27	35.16	33.37	34.77	34.29	34.7	34.44	34.95	35.05	34.51		D5 vs D11	non-sig			95.3016	95.5719	96.3557	97.0855	95.3286	95.0313	90.1933	93.9772	92.6799	93.788	93.0853	94.4637	94.734	93.2745		94.5497	95.3251	96.0471	94.309	94.0149	89.2286	92.9721	91.6886	92.7849	92.0897	93.4534	93.7208	92.2768
	Average	36.9983	37.3983	37.4467	37.63	37.1433	37.29	35.1917	35.5417	35.2783	36.295	36.3717	36.91	37.3283	37.1267		D5 vs D12	non-sig			100	101.081	101.212	101.707	100.392	100.788	95.1169	96.0629	95.3511	98.099	98.3062	99.7613	100.892	100.347		100	100.129	100.619	99.3182	99.7103	94.0996	95.0354	94.3313	97.0498	97.2548	98.6942	99.8128	99.2736
	SD	2.48834	2.49996	2.27325	2.44698	2.67001	2.93871	2.86267	3.26639	3.34224	3.1243	2.68728	2.75309	2.73322	2.77436		D5 vs D13	non-sig			6.72554	6.75696	6.1442	6.61376	7.21656	7.94283	7.7373	8.82848	9.03348	8.44444	7.26326	7.44111	7.38742	7.4986		6.68469	6.07848	6.54302	7.13938	7.85787	7.65455	8.73405	8.93686	8.35412	7.18557	7.36152	7.3084	7.4184
	SE	1.01586	1.02061	0.928051	0.998976	1.09003	1.19972	1.16868	1.3335	1.36446	1.27549	1.09708	1.12394	1.11583	1.13263						2.74569	2.75852	2.50836	2.70006	2.94615	3.24265	3.15874	3.60421	3.6879	3.44743	2.96521	3.03782	3.0159	3.06129		2.72901	2.48153	2.67118	2.91464	3.20796	3.12496	3.56566	3.64846	3.41056	2.9335	3.00533	2.98364	3.02855
		33.79	34.19	34.79	35.44	34.69	34.73	32.86	32.55	32.69	35.02	35.33	35.99	36.93	36.41		D5 vs D6	<0.01			94.898	96.0213	97.7064	99.5319	97.4256	97.5379	92.2861	91.4155	91.8087	98.3524	99.223	101.077	103.717	102.256		94.9107	96.5763	98.3807	96.2987	96.4097	91.2187	90.3581	90.7467	97.2148	98.0753	99.9075	102.517	101.073
5		34.72	35.12	35.03	34.91	35.41	35.71	35.12	36.46	36.34	36.32	36.9	36.25	37.15	37.45		D5 vs D7	<0.05			97.5098	98.6332	98.3805	98.0434	99.4477	100.29	98.6332	102.397	102.06	102.003	103.632	101.807	104.334	105.177		97.4924	97.2425	96.9094	98.2974	99.1302	97.4924	101.212	100.879	100.824	102.434	100.629	103.128	103.96
5-FU + 4-BrBnMLT		36.05	36.45	37.22	37.74	37.15	36.77	35	34.28	34.64	36.36	37.06	38.16	37.99	38.32		D5 vs D8	<0.05			101.245	102.368	104.531	105.991	104.334	103.267	98.2962	96.2741	97.2852	102.116	104.082	107.171	106.694	107.62		101.184	103.322	104.765	103.128	102.073	97.1592	95.1605	96.1599	100.935	102.878	105.931	105.459	106.375
		36.39	36.79	37.03	37.18	37.18	36.58	34.71	35.84	36.04	37.04	37.07	37.32	38.45	38.64		D5 vs D9	non-sig			102.2	103.323	103.997	104.419	104.419	102.734	97.4817	100.655	101.217	104.025	104.11	104.812	107.985	108.519		102.128	102.794	103.211	103.211	101.545	96.3542	99.4911	100.046	102.822	102.906	103.6	106.736	107.264
		35.5	35.9	36.65	37.25	37.29	37.34	35.31	36.36	36.09	37.36	37.62	37.28	37.44	36.94		D5 vs D10	non-sig			99.7004	100.824	102.93	104.615	104.728	104.868	99.1668	102.116	101.357	104.924	105.654	104.699	105.149	103.745		99.6576	101.74	103.405	103.516	103.655	98.0198	100.935	100.185	103.711	104.432	103.488	103.933	102.545
		37.19	37.69	38.18	38.92	39.05	37.25	36.91	36.7	36.52	36.89	36.71	38.23	38.14	38.05		D5 vs D11	<0.05			104.447	105.851	107.227	109.305	109.67	104.615	103.66	103.071	102.565	103.604	103.099	107.368	107.115	106.862		104.627	105.987	108.041	108.402	103.405	102.461	101.878	101.379	102.406	101.906	106.126	105.876	105.626
	Average	35.6067	36.0233	36.4833	36.9067	36.795	36.3967	34.985	35.365	35.3867	36.4983	36.7817	37.205	37.6833	37.635		D5 vs D12	<0.01			100	101.17	102.462	103.651	103.337	102.219	98.2541	99.3213	99.3821	102.504	103.3	104.489	105.832	105.696		100	101.277	102.452	102.142	101.036	97.1176	98.1725	98.2326	101.319	102.105	103.28	104.608	104.474
	SD	1.21778	1.24418	1.32118	1.48851	1.54619	1.00403	1.29776	1.63085	1.47948	0.82773	0.77329	0.934853	0.600256	0.856662		D5 vs D13	<0.05			3.42009	3.49424	3.71047	4.18043	4.34242	2.81977	3.64472	4.58018	4.15507	2.32465	2.17175	2.6255	1.6858	2.4059		3.45382	3.66756	4.13208	4.2922	2.78715	3.60256	4.5272	4.10701	2.29776	2.14664	2.59513	1.6663	2.37808
	SE	0.497156	0.507935	0.539368	0.607682	0.63123	0.409892	0.52981	0.665792	0.603996	0.337919	0.315694	0.381652	0.245053	0.349731						1.39625	1.42652	1.51479	1.70665	1.77279	1.15117	1.48795	1.86985	1.6963	0.949034	0.886615	1.07186	0.688223	0.982206		1.41002	1.49727	1.68691	1.75228	1.13785	1.47074	1.84822	1.67668	0.938057	0.87636	1.05946	0.680263	0.970845
		37.31	38.31	39.59	39.69	39.35	39.27	35.9	36.95	35.72	37.47	37.71	38.47	38.69	38.12		D5 vs D6	<0.01			102.806	105.561	109.088	109.364	108.427	108.207	98.9208	101.814	98.4248	103.247	103.908	106.002	106.608	105.038		102.731	106.163	106.431	105.52	105.305	96.2682	99.0838	95.7855	100.478	101.122	103.16	103.75	102.221
6		37.68	38.68	39.91	39.97	40.61	41.28	39.16	39.53	38.01	39.1	39.16	39.33	40.13	40		D5 vs D7	<0.01			103.825	106.581	109.97	110.135	111.899	113.745	107.904	108.923	104.735	107.738	107.904	108.372	110.576	110.218		103.723	107.021	107.182	108.898	110.695	105.01	106.002	101.926	104.849	105.01	105.466	107.611	107.263
5-FU + Non-treatmemt		34.71	35.71	36.72	36.75	36.74	37.25	34.13	33.41	32.06	34.46	35.15	35.97	37.17	36.61		D5 vs D8	<0.01			95.6418	98.3972	101.18	101.263	101.235	102.641	94.0436	92.0597	88.3398	94.9529	96.8542	99.1137	102.42	100.877		95.7587	98.467	98.5475	98.5207	99.8883	91.5218	89.5911	85.9709	92.4067	94.257	96.4559	99.6737	98.1721
No treatment		38.45	39.45	40.53	40.38	40.15	40.04	37.71	38.01	37.49	38.29	38.23	38.94	38.54	39.29		D5 vs D9	<0.01			105.947	108.703	111.679	111.265	110.631	110.328	103.908	104.735	103.302	105.506	105.341	107.297	106.195	108.262		105.788	108.684	108.282	107.665	107.37	101.122	101.926	100.532	102.677	102.516	104.42	103.347	105.359
		34.61	35.61	37.12	36.53	36.91	36.79	35.12	35.93	35.29	35.53	35.16	35.8	35.71	36		D5 vs D10	<0.01			95.3662	98.1217	102.282	100.657	101.704	101.373	96.7715	99.0034	97.24	97.9013	96.8817	98.6452	98.3972	99.1963		95.4905	99.5397	97.9575	98.9765	98.6547	94.1765	96.3486	94.6324	95.276	94.2838	96	95.7587	96.5363
		34.99	35.99	39.87	36.28	35.81	35.71	33.02	32.88	33.11	35.06	34.6	35.31	35.99	36.56		D5 vs D11	<0.01			96.4133	99.1688	109.86	99.9679	98.6728	98.3972	90.9851	90.5993	91.2331	96.6062	95.3387	97.2951	99.1688	100.739		96.5095	106.914	97.2872	96.0268	95.7587	88.5453	88.1698	88.7866	94.0156	92.7821	94.686	96.5095	98.038
	Average	36.2917	37.2917	38.9567	38.2667	38.2617	38.39	35.84	36.1183	35.28	36.6517	36.6683	37.3033	37.705	37.7633		D5 vs D12	non-sig			100	102.755	107.343	105.442	105.428	105.782	98.7555	99.5224	97.2124	100.992	101.038	102.788	103.894	104.055		100	104.465	102.615	102.601	102.945	96.1073	96.8536	94.6056	98.2838	98.3285	100.031	101.108	101.265
	SD	1.71154	1.71154	1.61217	1.93166	2.0208	2.13967	2.27674	2.59873	2.34981	1.89436	1.92825	1.79768	1.71788	1.6339		D5 vs D13	non-sig			4.71607	4.71607	4.44227	5.3226	5.56821	5.89577	6.27346	7.16067	6.47479	5.21983	5.3132	4.95343	4.73354	4.50213		4.58961	4.32315	5.17987	5.41889	5.73767	6.10523	6.96865	6.30116	5.07986	5.17072	4.8206	4.6066	4.38141
	SE	0.698734	0.698734	0.658167	0.788597	0.824987	0.873518	0.929477	1.06093	0.959305	0.773371	0.787204	0.733901	0.701321	0.667037						1.92533	1.92533	1.81355	2.17294	2.27321	2.40694	2.56113	2.92333	2.64332	2.13099	2.1691	2.02223	1.93246	1.83799		1.8737	1.76492	2.11467	2.21225	2.34239	2.49245	2.84494	2.57244	2.07384	2.11094	1.968	1.88064	1.7887
7		37.11	37.2	38.19	38.41	38.64	39.46	39.21	40.02	40.17	40.06	40.49	40	40.85	39.96		D5 vs D6	non-sig			100.624	100.868	103.552	104.149	104.772	106.996	106.318	108.514	108.921	108.623	109.789	108.46	110.765	108.351		98.9296	101.562	102.147	102.759	104.94	104.275	106.429	106.828	106.535	107.679	106.376	108.636	106.27
No 5-FU		38.89	39.58	39.98	41.03	41.2	42.05	41.67	41.91	40.21	40.67	40.53	40.79	41.02	41.45		D5 vs D7	non-sig			105.45	107.321	108.406	111.253	111.714	114.018	112.988	113.639	109.029	110.277	109.897	110.602	111.226	112.392		105.259	106.323	109.115	109.567	111.828	110.817	111.455	106.934	108.158	107.785	108.477	109.088	110.232
Blank gel		33.01	34.03	35.75	36.05	35.82	36.37	36.31	36.67	37.25	37.97	38.13	37.21	37.95	37.47		D5 vs D8	non-sig			89.5065	92.2722	96.936	97.7495	97.1258	98.6171	98.4544	99.4306	101.003	102.956	103.389	100.895	102.901	101.6		90.4993	95.0735	95.8713	95.2596	96.7223	96.5627	97.5201	99.0626	100.977	101.403	98.9562	100.924	99.6476
		38.51	39.6	40.83	41.64	41.25	41.95	41.32	42.18	41.14	41.08	41.79	41.56	41.5	41.5		D5 vs D9	non-sig			104.42	107.375	110.71	112.907	111.849	113.747	112.039	114.371	111.551	111.388	113.313	112.69	112.527	112.527		105.312	108.583	110.737	109.7	111.562	109.886	112.173	109.408	109.248	111.136	110.525	110.365	110.365
	Average	36.88	37.6025	38.6875	39.2825	39.2275	39.9575	39.6275	40.195	39.6925	39.945	40.235	39.89	40.33	40.095		D5 vs D10	non-sig			100	101.959	104.901	106.514	106.365	108.345	107.45	108.989	107.626	108.311	109.097	108.162	109.355	108.717		100	102.885	104.468	104.322	106.263	105.385	106.894	105.558	106.23	107.001	106.083	107.254	106.629
	SD	2.69115	2.63472	2.24628	2.57047	2.57795	2.67496	2.46417	2.53888	1.68887	1.38175	1.52765	1.89679	1.61036	1.89023		D5 vs D11	non-sig			7.29703	7.14404	6.09077	6.96981	6.9901	7.25315	6.6816	6.88416	4.57937	3.74661	4.14221	5.14313	4.36649	5.12535		7.00677	5.97374	6.83589	6.85579	7.11379	6.55322	6.75189	4.49138	3.67462	4.06262	5.04431	4.28259	5.02687
	SE	1.34557	1.31736	1.12314	1.28523	1.28897	1.33748	1.23209	1.26944	0.844436	0.690875	0.763823	0.948393	0.805181	0.945115		D5 vs D12	non-sig			3.64852	3.57202	3.04539	3.4849	3.49505	3.62658	3.3408	3.44208	2.28969	1.87331	2.0711	2.57157	2.18325	2.56268		3.50339	2.98687	3.41794	3.4279	3.55689	3.27661	3.37594	2.24569	1.83731	2.03131	2.52216	2.1413	2.51344
																	D5 vs D13	non-sig
		0	1	2	3	4	5	6	7	8	9	10	11	12	13

## Sheet: Food
		Day 0	Day 1			Day 2			Day 3			Day 4			Day 5			Day 6			Day 7			Day 8			Day 9			Day 10			Day 11			Day 12			Day 13				D-6	D-5	D-4	D-3	D-2	D-1	D0
Food consumption (g)			D-6			D-5			D-4			D-3			D-2			D-1			D0			D1			D2			D3			D4			D5			D6
	Gr	Wt.Food (g)	Wt.Food (g) ก่อนเติม	Wt.Food (g) หลังเติม	∆	Wt.Food (g) ก่อนเติม	Wt.Food (g) หลังเติม	∆	Wt.Food (g) ก่อนเติม	Wt.Food (g) หลังเติม	∆	Wt.Food (g) ก่อนเติม	Wt.Food (g) หลังเติม	∆	Wt.Food (g) ก่อนเติม	Wt.Food (g) หลังเติม	∆	Wt.Food (g) ก่อนเติม	Wt.Food (g) หลังเติม	∆	Wt.Food (g) ก่อนเติม	Wt.Food (g) หลังเติม	∆	Wt.Food (g) ก่อนเติม	Wt.Food (g) หลังเติม	∆	Wt.Food (g) ก่อนเติม	Wt.Food (g) หลังเติม	∆	Wt.Food (g) ก่อนเติม	Wt.Food (g) หลังเติม	∆	Wt.Food (g) ก่อนเติม	Wt.Food (g) หลังเติม	∆	Wt.Food (g) ก่อนเติม	Wt.Food (g) หลังเติม	∆	Wt.Food (g) ก่อนเติม	Wt.Food (g) หลังเติม	∆
	1	132.56	103.31	109.56	29.25	80.61	73.39	28.95	45.31	102.56	28.08	78.61	105.31	23.95	82.06	101.5	23.25	83.49	100.94	18.01	82.27	106.84	18.67	88.49	100.82	18.35	82.23	101.84	18.59	81.18	103.46	20.66	81.63	100.2	21.83	77.92	100.37	22.28	76.44		23.93
	2	117.54	87.05	113.54	30.49	85.6	59.08	27.94	31.76	107.54	27.32	85.6	107.05	21.94	86.15	104.43	20.9	87.18	109.99	17.25	95.5	101.29	14.49	81.59	102.8	19.7	70.57	104.21	32.23	77.26	102.38	26.95	74.16	106.66	28.22	79.03	101.42	27.63	74.78		26.64
	3	119.53	90.37	124.53	29.16	98.11	49.35	26.42	22.94	119.53	26.41	98.11	103.37	21.42	81.64	103.35	21.73	87.28	103.03	16.07	86.25	100.8	16.78	80.62	108.31	20.18	82.47	102.82	25.84	83.88	102.95	18.94	80.82	100.45	22.13	78.24	102.73	22.21	79.99		22.74
	4	127.85	99.04	137.85	28.81	112.76	61.17	25.09	34.8	137.85	26.37	116.76	111.04	21.09	89.68	100.89	21.36	86.53	101.31	14.36	84.59	108.19	16.72	88.73	99.51	19.46	75.09	101.62	24.42	77.72	103.8	23.9	77.76	101.94	26.04	74.26	101.64	27.68	75.66		25.98
	5	115.35	86.82	122.04	28.53	95.06	106.29	26.98	78.08	102.04	28.21	77.06	96.82	24.98	72.51	86.14	24.31	70.53	102.18	15.61	84.79	108.51	17.39	89.2	101.57	19.31	76.22	101.78	25.35	76.01	102.69	25.77	75.96	101.11	26.73	73.26	100.62	27.85	73.04		27.58
	6	134.03	104.73	115.03	29.3	88.44	108.79	26.59	81.71	114.03	27.08	88.44	104.73	25.59	81.2	108.42	23.53	94.84	115.33	13.58	96.91	101.35	18.42	84.78	106.21	16.57	80.84	101.53	25.37	76.55	101.65	24.98	73.12	101.76	28.53	72.5	103.84	29.26	76.15		27.69
	7	116.78	96.8	115.08	19.98	95.6	107.2	19.48	88.07	105.08	19.13	85.6	109.8	19.48	89.52	101.79	20.28	82.82	101.34	18.97	82.46	103.14	18.88	85.58	99.86	17.56	81.46	102.59	18.4	84.66	100.5	17.93	81.93	100.74	18.57	81.26	102.69	19.48	82.9		19.79
Food consumption/ 1 mouse (g)	Gr
	1				4.875			4.825			4.68			3.99167			3.875			3.00167			3.11167			3.05833			3.09833			3.44333			3.63833			3.71333			3.98833
	2				5.08167			4.65667			4.55333			3.65667			3.48333			2.875			2.415			3.28333			5.37167			4.49167			4.70333			4.605			4.44
	3				4.86			4.40333			4.40167			3.57			3.62167			2.67833			2.79667			3.36333			4.30667			3.788			4.426			4.442			4.548
	4				4.80167			4.18167			4.395			3.515			3.56			2.39333			2.78667			3.24333			4.07			3.98333			4.34			4.61333			4.33
	5				4.755			4.49667			4.70167			4.16333			4.05167			2.60167			2.89833			3.21833			4.225			4.295			4.455			4.64167			4.59667
	6				4.88333			4.43167			4.51333			4.265			3.92167			2.26333			3.07			2.76167			4.22833			4.16333			4.755			4.87667			4.615
	7				4.995			4.87			4.7825			4.87			5.07			4.7425			4.72			4.39			4.6			4.4825			4.6425			4.87			4.9475
[truncated: 6 more columns]

## Sheet: _xltb_storage_
XL Toolbox Settings
	export_preset	<?xml version="1.0" encoding="utf-16"?>_x000D_ <Preset xmlns:xsd="http://www.w3.org/2001/XMLSchema" xmlns:xsi="http://www.w3.org/2001/XMLSchema-instance">_x000D_ <Name>Tiff, 300 dpi, RGB, Transparent canvas</Name>_x000D_ <Dpi>300</Dpi>_x000D_ <FileType>Tiff</FileType>_x000D_ <ColorSpace>Rgb</ColorSpace>_x000D_ <Transparency>TransparentCanvas</Transparency>_x000D_ <UseColorProfile>false</UseColorP…
	export_path	C:\Users\Pim\My Works\Ph.D\Experiments\+รวมไฟล์+\Part 2\6 Part in vivo 5-FU induced oral mucositis (ส่งแล้ว)\กราฟ 30-07-2021\Food of initial.tif
