# Supplementary material for: In vitro cytoprotective and in vivo anti-oral mucositis effects of melatonin and its derivatives
Source: PeerJ. 2024 Jul 5;12:e17608. doi: 10.7717/peerj.17608 (PMC11229687; doi:10.7717/peerj.17608)
Supplement: Supplemental Information 4 [file peerj-12-17608-s004.xlsx]

## Sheet: _xltb_storage_
XL Toolbox Settings
	export_preset	<?xml version="1.0" encoding="utf-16"?>_x000D_ <Preset xmlns:xsd="http://www.w3.org/2001/XMLSchema" xmlns:xsi="http://www.w3.org/2001/XMLSchema-instance">_x000D_ <Name>Tiff, 300 dpi, RGB, Transparent canvas</Name>_x000D_ <Dpi>300</Dpi>_x000D_ <FileType>Tiff</FileType>_x000D_ <ColorSpace>Rgb</ColorSpace>_x000D_ <Transparency>TransparentCanvas</Transparency>_x000D_ <UseColorProfile>false</UseColorP…
	export_path	C:\Users\Pim\My Works\Ph.D\Experiments\+รวมไฟล์เล่มธีสีส+\5 Part Wound healing and Cell Proliferations\1 Cytotoxicity\Graph เพิ่ม Control\E.tif

## Sheet: Cytotoxicity
			Control	EBM				BBM				Melatonin
		Concentration (µM)		12.5	25	50	100	12.5	25	50	100	12.5	25	50	100	250	500	1000	2000
		Absorbance	0.31	0.325	0.313	0.317	0.306	0.315	0.316	0.304	0.315	0.305718	0.33547	0.317861	0.334862	0.316	0.323	0.318	0.32
			0.326	0.324	0.3	0.307	0.34	0.318	0.317	0.309	0.306	0.341541	0.325147	0.317558	0.33213	0.323	0.317	0.332	0.325
			0.326	0.332	0.319	0.314	0.322	0.317	0.308	0.31	0.312	0.334862	0.321201	0.332434	0.33547	0.321	0.321	0.327	0.319
			0.331	0.331	0.329	0.327	0.338	0.319	0.309	0.318	0.316	0.303896	0.308146	0.333344	0.32029	0.338	0.323	0.325	0.33
			0.317	0.325	0.313	0.313	0.321	0.317	0.311	0.307	0.312	0.315	0.314	0.319	0.322	0.316	0.32	0.323	0.323
			0.324	0.329	0.31	0.317	0.335	0.322	0.317	0.312	0.305	0.328	0.327	0.326	0.33	0.326	0.314	0.327	0.325
			0.328	0.33	0.314	0.314	0.327	0.319	0.31	0.311	0.313	0.332	0.331	0.327	0.329	0.323	0.322	0.322	0.319
			0.324	0.328	0.324	0.321	0.323	0.31	0.312	0.31	0.319	0.336684	0.332434	0.317558	0.309968	0.333	0.328	0.33	0.327
		Average	0.32325	0.328	0.31525	0.31625	0.3265	0.317125	0.3125	0.310125	0.31225	0.324713	0.3243	0.323844	0.326715	0.3245	0.321	0.3255	0.3235
		SD	0.00669221	0.00302372	0.00887613	0.00592211	0.0111484	0.00352288	0.0036645	0.00405101	0.00477344	0.0145501	0.00941467	0.00672887	0.00872057	0.0077275	0.00420883	0.00450397	0.004
			Control	EBM				BBM				Melatonin
		Concentration (µM)		12.5	25	50	100	12.5	25	50	100	12.5	25	50	100	250	500	1000	2000
		%Viability	95.901	100.541	96.8291	98.0665	94.6636	97.4478	97.7572	94.0449	97.4478	94.5762	103.78	98.3329	103.592	97.7572	99.9227	98.3759	98.9946
			100.851	100.232	92.8074	94.9729	105.182	98.3759	98.0665	95.5916	94.6636	105.659	100.587	98.239	102.747	99.9227	98.0665	102.707	100.541
			100.851	102.707	98.6852	97.1384	99.6133	98.0665	95.2823	95.901	96.5197	103.592	99.366	102.841	103.78	99.3039	99.3039	101.16	98.6852
			102.398	102.398	101.779	101.16	104.563	98.6852	95.5916	98.3759	97.7572	94.0127	95.3275	103.123	99.0843	104.563	99.9227	100.541	102.088
			98.0665	100.541	96.8291	96.8291	99.3039	98.0665	96.2104	94.9729	96.5197	97.4478	97.1384	98.6852	99.6133	97.7572	98.9946	99.9227	99.9227
			100.232	101.779	95.901	98.0665	103.635	99.6133	98.0665	96.5197	94.3542	101.469	101.16	100.851	102.088	100.851	97.1384	101.16	100.541
			101.469	102.088	97.1384	97.1384	101.16	98.6852	95.901	96.2104	96.8291	102.707	102.398	101.16	101.779	99.9227	99.6133	99.6133	98.6852
			100.232	101.469	100.232	99.3039	99.9227	95.901	96.5197	95.901	98.6852	104.156	102.841	98.239	95.8911	103.016	101.469	102.088	101.16
		Average	100	101.469	97.5251	97.8345	101.005	98.1052	96.6744	95.9397	96.5971	100.452	100.325	100.184	101.072	100.387	99.3039	100.696	100.077
		SD	2.07029	0.935411	2.7459	1.83205	3.44883	1.08983	1.13364	1.25321	1.4767	4.50118	2.91251	2.08163	2.69778	2.39057	1.30204	1.39334	1.23743
		SE	0.731958	0.330718	0.970823	0.647729	1.21935	0.385314	0.400803	0.443078	0.522093	1.59141	1.02973	0.735968	0.953809	0.845192	0.46034	0.49262	0.437498
