# Supplementary material for: In vitro cytoprotective and in vivo anti-oral mucositis effects of melatonin and its derivatives
Source: PeerJ. 2024 Jul 5;12:e17608. doi: 10.7717/peerj.17608 (PMC11229687; doi:10.7717/peerj.17608)
Supplement: Supplemental Information 5 [file peerj-12-17608-s005.xlsx]

## Sheet: _xltb_storage_
XL Toolbox Settings
	export_preset	<?xml version="1.0" encoding="utf-16"?>_x000D_ <Preset xmlns:xsd="http://www.w3.org/2001/XMLSchema" xmlns:xsi="http://www.w3.org/2001/XMLSchema-instance">_x000D_ <Name>Tiff, 300 dpi, RGB, Transparent canvas</Name>_x000D_ <Dpi>300</Dpi>_x000D_ <FileType>Tiff</FileType>_x000D_ <ColorSpace>Rgb</ColorSpace>_x000D_ <Transparency>TransparentCanvas</Transparency>_x000D_ <UseColorProfile>false</UseColorP…
	export_path	C:\Users\Pim\My Works\Ph.D\Experiments\+รวมไฟล์เล่มธีสีส+\4 Part Chemoprotective 5-FU\1 Cytotoxicity of 5-FU vary Conc\กราฟ 5-FU เพิ่ม Control.tif

## Sheet: Magellan Sheet 3
			0.5% DMSO		5-FU (µg/ml)
		Blank	Control		0.25	0.5	1	2.5	5	10	20	40
5-FU
	1	1.873	1.842		1.256	1.362	1.444	1.219	1.377	1.206	1.328	1.232
	2	1.908	1.623		1.434	1.322	1.341	1.089	1.278	1.23	1.191	1.11
	3	1.965	1.763		1.305	1.432	1.288	1.258	1.228	1.132	1.182	1.004
	4	1.916	1.901		1.409	1.325	1.297	1.343	1.122	1.114	1.091	1.108
	5	1.984	1.751		1.418	1.311	1.334	1.247	1.097	1.092	1.1	0.927
	6	1.799	1.633		1.364	1.334	1.372	1.213	1.182	1.129	1.212	1.068
	7	1.897	1.879		1.458	1.174	1.198	1.251	1.164	1.18	1.119	1.135
	8	1.937	1.859		1.241	1.317	1.319	1.246	1.282	1.329	1.234	1.19
	AVG	1.90987	1.78137		1.36062	1.32212	1.32412	1.23325	1.21625	1.1765	1.18212	1.09675
	AVG Viability	107.214	100		76.3806	74.2194	74.3316	69.2302	68.2759	66.0445	66.3603	61.5676
	viability1		103.403		70.5073	76.4578	81.061	68.4303	77.2998	67.7005	74.5492	69.1601
	viability2		91.1094		80.4996	74.2123	75.2789	61.1326	71.7423	69.0478	66.8585	62.3114
	viability3		98.9685		73.258	80.3873	72.3037	70.6196	68.9355	63.5464	66.3532	56.361
	viability4		106.715		79.0962	74.3807	72.8089	75.3912	62.9851	62.536	61.2448	62.1991
	viability5		98.2949		79.6014	73.5948	74.886	70.0021	61.5816	61.301	61.7501	52.0385
	viability6		91.6708		76.5701	74.886	77.0192	68.0935	66.3532	63.378	68.0373	59.9537
	viability7		105.48		81.8469	65.9041	67.2514	70.2267	65.3428	66.241	62.8166	63.7148
	viability8		104.358		69.6653	73.9317	74.0439	69.946	71.9669	74.6053	69.2723	66.8023
	AVG Viability		100		76.3806	74.2194	74.3316	69.2302	68.2759	66.0445	66.3603	61.5676
	SD		6.07208		4.68999	4.02032	3.97051	3.95499	5.24557	4.36298	4.44936	5.49193
	SE		2.1468		1.65816	1.4214	1.40379	1.3983	1.85459	1.54255	1.57309	1.94169
