# Supplementary material for: In vitro cytoprotective and in vivo anti-oral mucositis effects of melatonin and its derivatives
Source: PeerJ. 2024 Jul 5;12:e17608. doi: 10.7717/peerj.17608 (PMC11229687; doi:10.7717/peerj.17608)
Supplement: Supplemental Information 6 [file peerj-12-17608-s006.xlsx]

## Sheet: _xltb_storage_
XL Toolbox Settings
	export_preset	<?xml version="1.0" encoding="utf-16"?>_x000D_ <Preset xmlns:xsd="http://www.w3.org/2001/XMLSchema" xmlns:xsi="http://www.w3.org/2001/XMLSchema-instance">_x000D_ <Name>Tiff, 300 dpi, RGB, Transparent canvas</Name>_x000D_ <Dpi>300</Dpi>_x000D_ <FileType>Tiff</FileType>_x000D_ <ColorSpace>Rgb</ColorSpace>_x000D_ <Transparency>TransparentCanvas</Transparency>_x000D_ <UseColorProfile>false</UseColorP…
	export_path	C:\Users\Pim\My Works\Ph.D\Experiments\+รวมไฟล์เล่มธีสีส+\3 Part Callular Antioxidant\1 Cytotoxicity of H2O2 vary Conc\graph เพิ่ม control.tif

## Sheet: Sheet1
			0	0.1	0.2	0.3	0.4	0.5	0.6	0.7	0.8	0.9	1	2	mM		0.5% DMSO	0.5% DMSO + 0.4 mM H₂O₂		Melatonin				Melatonin + H₂O₂				4-EBM				4-EBM + H₂O₂				4-BrBn-MLT				4BrBnMLT + H₂O₂
	Blank		Control	H₂O₂													Control	H₂O₂		12.5	25	50	100	12.5	25	50	100	12.5	25	50	100	12.5	25	50	100	12.5	25	50	100	12.5	25	50	100
	1.43405		2.04449	1.31794	1.39605	1.36703	1.02277	0.996629	0.846251	0.602112	0.514272	0.472396	0.132361	0.128113			1.542	0.734		1.951	2.011	1.798	1.992	0.631	0.801	0.886	1.283	1.769	2.025	1.917	1.382	0.336	1.198	1.159	0.864	1.638	1.531	1.332	1.334	1.329	1.043	0.851	0.551
	1.55303		1.75368	1.43458	1.50221	1.31365	1.05504	0.984728	0.951426	0.355469	0.337451	0.40284	0.160536	0.115085			1.771	0.714		1.978	2.032	1.715	1.876	0.531	0.805	1.258	1.518	1.947	1.951	1.852	1.336	0.321	1.395	1.312	0.814	1.688	1.658	1.361	1.387	1.504	0.94	0.864	0.513
	1.37156		1.79835	1.4475	1.59943	1.35249	1.06936	0.827861	0.857552	0.782477	0.611709	0.200521	0.157103	0.116074			1.575	0.787		2.112	2.001	1.806	1.904	0.645	0.893	0.91	1.251	1.784	2.054	2.036	1.331	0.364	1.205	1.201	0.824	1.684	1.528	1.367	1.307	1.394	1.008	0.781	0.663
	1.46432		1.79735	1.45399	1.6106	1.49389	1.0802	0.980111	0.935701	0.510623	0.444661	0.295957	0.165858	0.12058			1.634	0.739		1.774	1.815	1.861	2.175	0.727	0.694	0.602	1.063	1.691	2.015	1.921	1.203	0.333	1.089	1.144	0.975	1.521	1.388	1.298	1.325	1.094	1.275	1.006	0.468
	1.42167		1.78472	1.67926	1.6954	1.41143	1.01527	0.968231	0.767244	0.496618	0.594638	0.270181	0.135965	0.12083			1.613	0.721		1.982	1.952	1.786	1.943	0.643	0.803	0.742	1.255	1.902	2.012	1.963	1.292	0.344	1.229	1.146	0.931	1.648	1.518	1.342	1.348	1.326	0.984	0.847	0.548
	1.36374		1.93627	1.59835	1.5063	1.19731	1.09049	1.099	0.841682	0.629565	0.63435	0.341013	0.145794	0.133105			1.689	0.754		1.951	1.943	1.799	1.984	0.737	0.795	0.876	1.274	1.801	2.005	1.932	1.266	0.318	1.197	0.965	0.821	1.642	1.516	1.345	1.329	1.333	1.023	0.816	0.543
	1.5533		1.89267	1.51663	1.34915	1.35921	1.07117	0.956901	0.870182	0.673665	0.514182	0.316209	0.173238	0.127895			1.624	0.746		1.945	1.935	1.769	2.016	0.624	0.795	0.878	1.254	1.756	2.003	1.924	1.244	0.359	1.212	1.183	0.912	1.639	1.527	1.351	1.344	1.343	1.012	0.871	0.537
	1.48394		1.86984	1.39236	1.34225	1.37774	1.09795	1.08742	0.947474	0.763655	0.461508	0.431339	0.185896	0.124582			1.732	0.781		1.948	1.921	1.798	1.988	0.614	0.812	0.964	1.294	1.806	1.987	1.942	1.263	0.335	1.223	1.149	0.891	1.634	1.531	1.344	1.342	1.328	1.041	0.869	0.558
Average	1.4557		1.85967	1.48008	1.50017	1.35909	1.06278	0.98761	0.877189	0.601773	0.514096	0.341307	0.157094	0.123283		Average	1.6475	0.747		1.95513	1.95125	1.7915	1.98475	0.644	0.79975	0.8895	1.274	1.807	2.0065	1.93588	1.28963	0.33875	1.2185	1.15738	0.879	1.63675	1.52462	1.3425	1.3395	1.33137	1.04075	0.863125	0.547625
SD	0.0727334		0.0968888	0.115136	0.13027	0.084178	0.0300956	0.083967	0.0639365	0.143842	0.0994748	0.0899547	0.0183798	0.00627096		SD	0.0778515	0.0261971		0.0916896	0.06801	0.0406553	0.0904951	0.0652227	0.0536037	0.187655	0.122956	0.0816718	0.0297033	0.0515016	0.0576366	0.0163685	0.0838025	0.0955121	0.0585442	0.0513051	0.0723798	0.0210916	0.0231825	0.113548	0.100331	0.0653374	0.0549076
%Cell viability			100	79.588	80.6687	73.0825	57.1489	53.1067	47.169	32.3591	27.6445	18.3531	8.44739	6.62928		%Cell viability	100	45.3414		105.133	104.924	96.3342	106.726	32.9391	40.9865	49.6511	64.1894	97.1677	107.895	104.098	69.3469	18.7465	60.7276	59.7856	68.1593	88.0128	81.9835	72.1901	72.0288	81.3426	68.2627	64.2924	40.8828
SD			5.21	6.1912	7.005	4.5265	1.61833	4.51515	3.43805	7.73478	5.34905	4.83712	0.988334	0.337208		SD	4.72543	1.59011						3.33599	2.74715	10.4748	6.19506					0.90584	4.17655	4.93379	4.53963					6.9374	6.58067	4.86685	4.09911
SE			1.84201	2.18892	2.47664	1.60036	0.572165	1.59635	1.21554	2.73466	1.89117	1.71018	0.349429	0.119221		SE	1.67069	0.562189						1.17945	0.971263	3.70339	2.19028					0.320263	1.47663	1.74436	1.605					2.45274	2.32662	1.72069	1.44925
																Cell Death		54.6586						67.0609	59.0135	50.3489	35.8106					81.2535	39.2724	40.2144	31.8407					18.6574	31.7373	35.7076	59.1172
																%Protective		0						-22.6906	-7.96742	7.88477	34.4832					-48.6564	28.1497	26.4262	41.7463					65.8656	41.9353	34.6715	-8.15725
															Cell viability	n1	93.5964	44.5524		104.911	108.137	96.6837	107.116	32.2742	41.0506	49.4558	64.6429	95.1243	108.89	103.083	74.3142	18.5944	59.706	59.8696	66.9962	88.08	82.3263	71.6255	71.7331	81.1975	68.4103	63.3892	41.1348
																n2	107.496	43.3384		106.363	109.267	92.2206	100.878	27.1594	41.2556	70.2205	76.4832	104.696	104.911	99.5874	71.8406	17.7643	69.524	67.773	63.1191	90.7687	89.1555	73.1849	74.583	91.8894	61.6545	64.3575	38.2979
																n3	95.5994	47.7693		113.568	107.6	97.1139	102.384	32.9902	45.7655	50.7954	63.0306	95.9309	110.45	109.482	71.5718	20.1439	60.0548	62.0391	63.8945	90.5536	82.165	73.5076	70.2812	85.1688	66.1146	58.175	49.4961
																n4	99.1806	44.8558		95.3932	97.5978	100.071	116.956	37.1843	35.5669	33.6031	53.5584	90.93	108.352	103.298	64.6888	18.4283	54.2736	59.0947	75.6034	81.7886	74.6368	69.7972	71.2491	66.8398	83.6271	74.9348	34.9384
																n5	97.9059	43.7633		106.578	104.965	96.0384	104.481	32.8879	41.1531	41.4178	63.2321	102.276	108.191	105.556	69.4746	19.0371	61.2509	59.198	72.1915	88.6178	81.6273	72.1633	72.4859	81.0142	64.5405	63.0912	40.9108
																n6	102.519	45.7663		104.911	104.481	96.7375	106.685	37.6958	40.7431	48.8976	64.1894	96.845	107.815	103.889	68.0765	17.5982	59.6561	49.8483	63.6619	88.2951	81.5197	72.3246	71.4642	81.4419	67.0985	60.7821	40.5375
																n7	98.5736	45.2807		104.588	104.051	95.1243	108.406	31.9161	40.7431	49.0092	63.1818	94.4252	107.707	103.459	66.8935	19.8672	60.4037	61.1093	70.7182	88.1338	82.1112	72.6472	72.2708	82.0528	66.377	64.879	40.0896
																n8	105.129	47.4052		104.75	103.298	96.6837	106.901	31.4046	41.6143	53.8097	65.1971	97.1139	106.847	104.427	67.9152	18.539	60.9519	59.353	69.0899	87.8649	82.3263	72.2708	72.1633	81.1364	68.2791	64.73	41.6573
																%Viability	100	45.3414		105.133	104.924	96.3342	106.726	32.9391	40.9865	49.6511	64.1894	97.1677	107.895	104.098	69.3469	18.7465	60.7276	59.7856	68.1593	88.0128	81.9835	72.1901	72.0288	81.3426	68.2627	64.2924	40.8828
															Cell death	n1	6.40364	55.4476		-4.91096	-8.13734	3.31629	-7.11565	67.7258	58.9494	50.5442	35.3571	4.87571	-8.89016	-3.08269	25.6858	81.4056	40.294	40.1304	33.0038	11.92	17.6737	28.3745	28.2669	18.8025	31.5897	36.6108	58.8652
																n2	-7.49621	56.6616		-6.36283	-9.26657	7.77944	-0.877996	72.8406	58.7444	29.7795	23.5168	-4.69587	-4.91096	0.412554	28.1594	82.2357	30.476	32.227	36.8809	9.23131	10.8445	26.8151	25.417	8.11059	38.3455	35.6425	61.7021
																n3	4.40061	52.2307		-13.5684	-7.59961	2.88611	-2.38364	67.0098	54.2345	49.2046	36.9694	4.06911	-10.4496	-9.48166	28.4282	79.8561	39.9452	37.9609	36.1055	9.4464	17.835	26.4924	29.7188	14.8312	33.8854	41.825	50.5039
																n4	0.819423	55.1442		4.60684	2.40215	-0.0714021	-16.9561	62.8157	64.4331	66.3969	46.4416	9.06999	-8.35243	-3.29778	35.3112	81.5717	45.7264	40.9053	24.3966	18.2114	25.3632	30.2028	28.7509	33.1602	16.3729	25.0652	65.0616
																n5	2.09408	56.2367		-6.57793	-4.96474	3.96157	-4.48078	67.1121	58.8469	58.5822	36.7679	-2.27609	-8.19111	-5.55624	30.5254	80.9629	38.7491	40.802	27.8085	11.3822	18.3727	27.8367	27.5141	18.9858	35.4595	36.9088	59.0892
																n6	-2.51897	54.2337		-4.91096	-4.48078	3.26252	-6.68547	62.3042	59.2569	51.1024	35.8106	3.15497	-7.8147	-3.88928	31.9235	82.4018	40.3439	50.1517	36.3381	11.7049	18.4803	27.6754	28.5358	18.5581	32.9015	39.2179	59.4625
																n7	1.4264	54.7193		-4.58833	-4.0506	4.87571	-8.4062	68.0839	59.2569	50.9908	36.8182	5.57475	-7.70716	-3.4591	33.1065	80.1328	39.5963	38.8907	29.2818	11.8662	17.8888	27.3528	27.7292	17.9472	33.623	35.121	59.9104
																n8	-5.12898	52.5948		-4.74965	-3.29778	3.31629	-6.90056	68.5954	58.3857	46.1903	34.8029	2.88611	-6.84679	-4.42701	32.0848	81.461	39.0481	40.647	30.9101	12.1351	17.6737	27.7292	27.8367	18.8636	31.7209	35.27	58.3427
																%Cell death	-1.77636e-15	54.6586		-5.13278	-4.92441	3.66582	-6.7258	67.0609	59.0135	50.3489	35.8106	2.83234	-7.89536	-4.09765	30.6531	81.2535	39.2724	40.2144	31.8407	11.9872	18.0165	27.8099	27.9712	18.6574	31.7373	35.7076	59.1172
															Protective to cell death	n1		1.44364						-23.9071	-7.85022	7.52734	35.3128					-48.9348	26.2805	26.5798	39.6183					65.6001	42.2053	33.0191	-7.69628
																n2		3.66463						-33.2647	-7.47517	45.5172	56.9751					-50.4535	44.2431	41.0394	32.525					85.1614	29.8454	34.7907	-12.8865
																n3		-4.44198						-22.597	0.775923	9.9783	32.3631					-46.0999	26.9187	30.5491	33.9437					72.8657	38.0054	23.4796	7.6011
																n4		0.888395						-14.9237	-17.8828	-21.4757	15.0332					-49.2386	16.3418	25.1622	55.3654					39.3321	70.0452	54.1423	-19.0327
																n5		2.88728						-22.7842	-7.66269	-7.17842	32.7318					-48.1248	29.1071	25.3512	49.1233					65.2647	35.1254	32.474	-8.10603
																n6		-0.777346						-13.988	-8.41279	6.50611	34.4832					-50.7573	26.1893	8.24543	33.5181					66.0472	39.8054	28.2494	-8.78895
																n7		0.111049						-24.5621	-8.41279	6.71035	32.6396					-46.6061	27.557	28.848	46.4279					67.165	38.4854	35.7447	-9.60845
																n8		-3.77568						-25.4979	-6.81883	15.493	36.3268					-49.0361	28.56	25.6347	43.4487					65.4883	41.9653	35.4721	-6.74019
																%Protective		-1.55431e-15						-22.6906	-7.96742	7.88477	34.4832					-48.6564	28.1497	26.4262	41.7463					65.8656	41.9353	34.6715	-8.15725
																SD		2.90917						6.10332	5.02601	19.164	11.3341					1.65727	7.64116	9.02657	8.30544					12.6922	12.0396	8.90409	7.49948
																SE		1.02855						2.15785	1.77696	6.7755	4.00721					0.585933	2.70156	3.19137	2.93642					4.48739	4.25664	3.14807	2.65147
