# Supplementary material for: In vitro cytoprotective and in vivo anti-oral mucositis effects of melatonin and its derivatives
Source: PeerJ. 2024 Jul 5;12:e17608. doi: 10.7717/peerj.17608 (PMC11229687; doi:10.7717/peerj.17608)
Supplement: Supplemental Information 7 [file peerj-12-17608-s007.xlsx]

## Sheet: _xltb_storage_
XL Toolbox Settings
	export_preset	<?xml version="1.0" encoding="utf-16"?>_x000D_ <Preset xmlns:xsd="http://www.w3.org/2001/XMLSchema" xmlns:xsi="http://www.w3.org/2001/XMLSchema-instance">_x000D_ <Name>Tiff, 300 dpi, RGB, Transparent canvas</Name>_x000D_ <Dpi>300</Dpi>_x000D_ <FileType>Tiff</FileType>_x000D_ <ColorSpace>Rgb</ColorSpace>_x000D_ <Transparency>TransparentCanvas</Transparency>_x000D_ <UseColorProfile>false</UseColorP…
	export_path	C:\Users\Pim\My Works\Ph.D\Experiments\+รวมไฟล์เล่มธีสีส+\4 Part Chemoprotective 5-FU\4 Effect of drug on ROS against 5-FU\กราฟ.tif

## Sheet: 5-FU
			Control	12.5	25	50	100	12.5	25	50	100	12.5	25	50	100	12.5	25	50	100	12.5	25	50	100	12.5	25	50	100
	Blank	DMSO	DMSO + 5-FU	Melatonin				Melatonin + 5-FU				4-EBM				4-EBM + 5-FU				4-BrBnMLT				4-BrBnMLT + 5-FU
n1	238.998	232.831	290.104	190.834	194.324	184.297	197.606	222.56	208.757	210.269	218.188	200.071	212.982	222.846	203.523	232.4	230.873	242.199	230.949	229.175	219.711	221.889	214.381	271.588	250.603	266.143	250.342
n2	232.716	236.017	296.152	204.597	191.392	201.247	195.048	214.08	207.73	218.612	209.71	215.116	213.569	233.406	219.117	242.3	236.326	249.366	231.764	264.81	241.006	272.24	246.379	266.457	255.52	270.193	252.677
n3	227.203	256.304	299.153	187.466	183.567	181.552	184.418	220.148	219.222	206.502	218.354	225.754	212.356	218.756	209.959	234.743	233.394	247.815	222.819	252.886	232.561	259.217	241.938	274.089	256.525	268.051	251.365
n4	242.878	250.093	297.551	191.959	187.221	185.801	194.424	223.365	218.672	215.256	216.52	215.914	216.237	226.323	211.379	238.211	236.391	237.664	235.236	250.981	233.825	253.847	236.665	275.407	243.986	278.223	260.44
n5	230.145	253.406	291.39	194.639	190.301	192.263	188.09	219.32	210.541	213.631	215.19	209.38	211.669	226.003	208.854	233.905	236.043	246.17	228.98	246.933	228.361	248.383	231.801	266.881	256.165	274.61	257.011
n6	237.239	239.901	298.93	193.028	188.59	190.205	193.745	220.725	212.732	209.64	216.23	216.77	209.701	221.911	212.832	236.911	235.55	241.085	230.668	249.45	232.618	252.64	236.096	276.191	246.621	266.605	258.712
n7	235.653	243.021	295.38	195.57	190.932	186.859	190.97	216.86	216.639	211.679	215.39	210.524	216.203	227.095	212.366	238.853	233.062	242.655	229.828	247.164	229.03	249.052	231.432	269.983	254.192	272.69	250.411
n8	238.759	238.916	297.24	196.299	191.761	190.032	194.557	223.255	214.467	215.69	215.97	215.647	211.035	223.683	208.901	237.975	232.327	247.15	231.296	250.257	231.631	251.653	235.171	274.484	249.651	268.695	248.701
Average	235.449	243.811	295.737	194.299	189.761	189.032	192.357	220.039	213.595	212.66	215.694	213.647	212.969	225.003	210.866	236.912	234.246	244.263	230.193	248.957	231.093	251.115	234.233	271.885	251.658	270.651	253.707
SD	5.149	8.52545	3.34537	5.03654	3.28051	6.04215	4.29268	3.25961	4.3971	3.89156	2.68584	7.3669	2.3295	4.35414	4.42572	3.15595	2.10593	3.98427	3.50294	9.79372	5.99728	14.0807	9.44926	3.79412	4.7012	4.21992	4.39305
substract			51.9264					25.7401	23.834	23.6279	23.3367					23.2652	21.2768	19.2603	19.3262					22.928	20.5652	19.5359	19.4747
ROS			100					49.5704	45.8996	45.5026	44.9418					44.8043	40.9748	37.0916	37.2184					44.1548	39.6046	37.6223	37.5045
substract1			46.2929					28.261	18.996	21.237	25.8307					18.753	17.904	17.1963	20.0827					22.631	19.5103	15.0277	16.1093
substract2			52.3409					19.781	17.969	29.58	17.3527					28.653	23.357	24.3633	20.8977					17.5	24.4273	19.0777	18.4443
substract3			55.3419					25.849	29.461	17.47	25.9967					21.096	20.425	22.8123	11.9527					25.132	25.4323	16.9357	17.1323
substract4			53.7399					29.066	28.911	26.224	24.1627					24.564	23.422	12.6613	24.3697					26.45	12.8933	27.1077	26.2073
substract5			47.5789					25.021	20.78	24.599	22.8327					20.258	23.074	21.1673	18.1137					17.924	25.0723	23.4947	22.7783
substract6			55.1189					26.426	22.971	20.608	23.8727					23.264	22.581	16.0823	19.8017					27.234	15.5283	15.4897	24.4793
substract7			51.5689					22.561	26.878	22.647	23.0327					25.206	20.093	17.6523	18.9617					21.026	23.0993	21.5747	16.1783
substract8			53.4289					28.956	24.706	26.658	23.6127					24.328	19.358	22.1473	20.4297					25.527	18.5583	17.5797	14.4683
Avg substract			51.9264					25.7401	23.834	23.6279	23.3367					23.2652	21.2768	19.2603	19.3262					22.928	20.5652	19.5359	19.4747
ROS1			89.151					54.4251	36.5826	40.8983	49.7448					36.1146	34.4796	33.1168	38.6753					43.5829	37.5731	28.9403	31.0234
ROS2			100.798					38.0943	34.6048	56.9653	33.4178					55.1801	44.981	46.919	40.2448					33.7016	47.0422	36.7398	35.5202
ROS3			106.578					49.7801	56.7361	33.6438	50.0645					40.6268	39.3345	43.9321	23.0185					48.3993	48.9777	32.6148	32.9935
ROS4			103.492					55.9754	55.6769	50.5023	46.5326					47.3054	45.1062	24.3832	46.9312					50.9375	24.83	52.204	50.4702
ROS5			91.6276					48.1855	40.0182	47.3728	43.9712					39.0129	44.436	40.7641	34.8834					34.5181	48.2844	45.2461	43.8666
ROS6			106.148					50.8913	44.2376	39.687	45.9741					44.8019	43.4866	30.9714	38.1341					52.4473	29.9045	29.8301	47.1424
ROS7			99.3115					43.4481	51.7617	43.6137	44.3564					48.5418	38.6952	33.9949	36.5164					40.4919	44.4848	41.5486	31.1563
ROS8			102.894					55.7636	47.5789	51.3381	45.4734					46.851	37.2797	42.6514	39.3435					49.16	35.7397	33.855	27.8632
Average ROS			100.005					49.5704	45.8996	45.5026	44.9418					44.8043	40.9748	37.0916	37.2184					44.1548	39.6046	37.6223	37.5045
SD			6.44253					6.27737	8.46795	7.49439	5.1724					6.07774	4.0556	7.67293	6.74597					7.30673	9.05359	8.12674	8.46016
SE			3.22127					3.13869	4.23398	3.74719	2.5862					3.03887	2.0278	3.83646	3.37299					3.65337	4.52679	4.06337	4.23008
